# Supplementary material for: Minimally invasive endodontics: a new era for pulpotomy in mature permanent teeth
Source: PubMed Central journal article supplement (PMC9758046; doi:10.1038/s41415-022-5316-1), 2022-12-16
Supplement: 41415_2022_5316_MOESM1_ESM.pdf [file 41415_2022_5316_MOESM1_ESM.pdf]

**Supplementary Table 1 Clinical studies investigating VPT in permanent teeth (2010-2022)**

| <b>Study design</b> | <b>Authors, year and country</b>                         | <b>Baseline sample size and age</b> | <b>Teeth type and initial diagnosis</b>             | <b>VPT</b> | <b>PM</b>        | <b>Primary outcome</b>                                    | <b>Follow-up period</b> | <b>Results</b>                                                                                                                                 |
|---------------------|----------------------------------------------------------|-------------------------------------|-----------------------------------------------------|------------|------------------|-----------------------------------------------------------|-------------------------|------------------------------------------------------------------------------------------------------------------------------------------------|
| RCT                 | Asgary and Eghbal <sup>61</sup><br>2010 Iran             | 407 teeth<br>9–65 years             | Mature molars.<br>IP                                | FP         | CEM              | Post-treatment pain                                       | 7 days                  | FP had better pain reducing effects than RCTx                                                                                                  |
| RCT                 | Asgary <i>et al.</i> <sup>63</sup><br>2013 Iran          | 407 teeth<br>9–65 years             | Mature molars.<br>IP                                | FP         | CEM              | Clinical and radiographic success                         | 1 year                  | FP (97.6%) and RCTx (98.3%) had similar clinical success rates. Radiographic success was significantly better for FP (92.8%) than RCTx (81.2%) |
| Prosp.              | Alqaderi <i>et al.</i> <sup>67</sup><br>2014 Kuwait      | 29 teeth<br>10–15 years             | Mature premolars and molars.<br>Deep caries, RP     | FP         | MTA              | Clinical and radiographic success                         | 47 months               | Overall success rate of FP was 90%                                                                                                             |
| RCT                 | Asgary <i>et al.</i> <sup>62</sup><br>2014 Iran          | 407 teeth<br>9–65 years             | Mature molars.<br>IP                                | FP         | CEM              | Clinical and radiographic success;<br>Treatment time/cost | 2 years                 | FP and RCTx had similar clinical and radiographic success rates; Treatment time/costs were significantly better for FP                         |
| RCT                 | Asgary <i>et al.</i> <sup>42</sup><br>2015 Iran          | 407 teeth<br>9–65 years             | Mature molars.<br>IP                                | FP         | CEM              | Clinical and radiographic success                         | 5 years                 | No significant difference in the five-year success rates of FP and RCTx                                                                        |
| Retro.              | Kunert <i>et al.</i> <sup>54</sup><br>2015 Brazil        | 273 teeth<br>8–79 years             | Not reported                                        | FP         | CH               | Clinical and radiographic success                         | 1–29 years              | FP success rates of 89% at 1 year and 63% at 10 years                                                                                          |
| RCT                 | Kumar <i>et al.</i> <sup>66</sup><br>2016 India          | 54 teeth<br>14–32 years             | Mature lower molars.<br>IP                          | FP         | MTA<br>CH<br>PRF | Clinical and radiographic success                         | 1 year                  | FP with the three medicaments had similar clinical and radiographic success rates                                                              |
| Retro.              | Linsuwanont <i>et al.</i> <sup>55</sup><br>2017 Thailand | 66 teeth<br>7–68 years              | Young/mature molars.<br>Carious exposure, IP and AP | FP         | MTA              | Clinical and radiographic success                         | 62 months               | Overall success rates of FP was 87.3%, including success rates of 84% and 76% for teeth with IP and AP, respectively                           |

|        |                                                        |                          |                                                                           |                        |             |                                                        |              |                                                                                                           |
|--------|--------------------------------------------------------|--------------------------|---------------------------------------------------------------------------|------------------------|-------------|--------------------------------------------------------|--------------|-----------------------------------------------------------------------------------------------------------|
| Prosp. | Taha <i>et al.</i> <sup>41</sup><br>2017 Jordan        | 52 teeth<br>11–51 years  | Mature molars.<br>Cariou exposure, IP and AP                              | FP                     | MTA         | Clinical and radiographic success                      | 3 years      | Overall 92.7% success rate for FP after 3 years                                                           |
| Prosp. | Qudeimat <i>et al.</i> <sup>47</sup><br>2017 Kuwait    | 23 teeth<br>7–13 years   | Young/mature molars.<br>IP                                                | FP                     | MTA         | Clinical and radiographic success                      | 19-74 months | 100% clinical and radiographic success rates                                                              |
| RCT    | Asgary <i>et al.</i> <sup>69</sup><br>2017 Iran        | 412 teeth<br>9–65 years  | Mature molars.<br>IP and AP                                               | FP                     | MTA<br>CEM  | Clinical and radiographic success                      | 5 years      | 5-year success rates of FP were similar for both MTA (85%) and CEM (78%)                                  |
| RCT    | Taha and Khazali <sup>39</sup><br>2017 Jordan          | 50 teeth<br>20–52 years  | Mature molars.<br>IP                                                      | PP                     | MTA<br>CH   | Clinical and radiographic success                      | 2 years      | Success rates of MTA FP (85%) were significantly better than CH FP (43%)                                  |
| RCT    | Galani <i>et al.</i> <sup>65</sup><br>2017 India       | 54 teeth<br>15–50 years  | Mature 1 <sup>st</sup> & 2 <sup>nd</sup> lower molars.<br>Cariou exposure | FP                     | MTA         | Clinical and radiographic success; post-operative pain | 18 months    | Overall success rates were similar for FP (85%) and RCTx (87.5%); Pain relief significantly better for FP |
| Prosp. | Taha and Abdelkader <sup>40</sup><br>2018 Jordan       | 64 teeth<br>19–65 years  | Mature molars.<br>IP with or without AP                                   | FP                     | Biod        | Clinical and radiographic success                      | 1 year       | FP clinical and radiographic success rates were 100% and 98.4%, respectively                              |
| RCT    | Asgary <i>et al.</i> <sup>64</sup><br>2018 Iran        | 302 teeth<br>12–75 years | Mature molars.<br>Deep caries, RP, IP, AP                                 | IPC<br>DPC<br>PP<br>FP | CEM         | Clinical and radiographic success                      | 1 year       | Comparable success rates for all four VPT procedures                                                      |
| RCT    | Awawdeh <i>et al.</i> <sup>43</sup><br>2018 Jordan     | 68 teeth<br>16–59 years  | Mature incisors, premolars, molars.<br>Deep caries, RP                    | DPC<br>PP              | MTA<br>Biod | Clinical and radiographic success                      | 3 years      | Overall success rates were similar for VPT procedures using MTA (96%) and Biod. (91.7%)                   |
| RCT    | Uesrichai <i>et al.</i> <sup>44</sup><br>2019 Thailand | 69 teeth<br>6–18 years   | Young/mature molars.<br>IP                                                | PP                     | MTA<br>Biod | Clinical and radiographic success                      | 14–50 months | Overall success rates were similar for PP with MTA (92%) and Biod. (87%)                                  |
| Prosp. | Tan <i>et al.</i><br>2020 <sup>60</sup>                | 61 teeth<br>21–75 years  | Mature teeth.<br>Cariou exposure                                          | FP                     | MTA         | Pulp survival rates                                    | 4 years      | Overall pulp survival was 90.2%                                                                           |
| RCT    | Eghbal <i>et al.</i> <sup>68</sup><br>2020 Iran        | 550 teeth<br>10–61 years | Mature molars.<br>Cariou exposure, IP                                     | FP                     | MTA<br>CEM  | Post-operative pain relief                             | 7 days       | RCTx and FP with MTA or CEM had comparable post-operative pain relief                                     |
| Prosp. | Guan <i>et al.</i> <sup>57</sup><br>2021 China         | 59 teeth<br>6–20 years   | Young/mature pre-/molars.<br>Cariou exposure, IP                          | DPC<br>PP<br>FP        | iRoot       | Clinical and radiographic success                      | 6–36 months  | Overall success rates of the three VPT procedures was 91.2%                                               |

|        |                                                    |                             |                                                                                     |    |                   |                                                      |           |                                                                                                     |
|--------|----------------------------------------------------|-----------------------------|-------------------------------------------------------------------------------------|----|-------------------|------------------------------------------------------|-----------|-----------------------------------------------------------------------------------------------------|
| Retro. | Eggman et al. <sup>56</sup><br>2021<br>Switzerland | 111 teeth<br>24–50<br>years | Mature<br>premolars,<br>molars,<br>incisors, and<br>canines.<br>Carious<br>exposure | PP | MTA               | Pulp vitality<br>and tooth<br>survival               | 1–5 years | Success rate of PP in<br>maintaining pulp vitality<br>was 89.1%, with 98.4%<br>tooth survival rates |
| Prosp. | Rechithra et al. <sup>58</sup><br>2021 India       | 80 teeth<br>16–35<br>years  | Mature lower<br>molars.<br>IP                                                       | FP | MTA               | Clinical and<br>radiographic<br>success<br>depending | 1 year    | Overall success rate for<br>FP was 93.7%, and<br>cariou lesion site did not<br>influence pulpotomy  |
| RCT    | Asgary et al. <sup>45</sup><br>2021 Iran           | 157 teeth<br>10–60<br>years | Mature molars.<br>Carious<br>exposure, IP,<br>and AP                                | FP | MTA<br>CEM        | Clinical and<br>radiographic<br>success              | 2 years   | Clinical and radiographic<br>success rates were<br>similar for MTA/CEM FP<br>and RCTx (98-100%)     |
| RCT    | Koli et al. <sup>46</sup><br>2021 India            | 60 teeth<br>18–35<br>years  | Mature lower<br>molars.<br>IP and AP                                                | FP | MTA               | Clinical and<br>radiographic<br>success              | 1 year    | Clinical success rates<br>were similar for MTA<br>(93.3%) and RCTx (90%)<br>with no differences in  |
| Prosp. | Taha and Al- khatib <sup>59</sup><br>2022 Jordan   | 109 teeth<br>14–60<br>years | Mature molars.<br>Carious<br>exposure, RP<br>and IP                                 | FP | MTA               | Survival rate                                        | 4 years   | Overall survival rate was<br>83.8%                                                                  |
| RCT    | Taha et al. <sup>70</sup><br>2022 Jordan           | 193 teeth<br>10-70<br>years | Mature molars.<br>IP and RP                                                         | FP | MTA<br>Biod<br>TF | Clinical and<br>radiographic<br>success              | 1 year    | Overall success rates<br>were similar for FP with<br>MTA (91.8%), Biod<br>(93.3%), and TF (91.9%)   |

Key:

VPT = vital pulp therapy

PM = pulpotomy medicament

RCT = randomised controlled trial

Prosp = prospective

Retro = retrospective

IP = irreversible pulpitis

RP = reversible pulpitis

AP = apical periodontitis

RCTx = root canal treatment

FP = full pulpotomy

PP = partial pulpotomy

DPC = direct pulp capping

IPC = indirect pulp capping

CEM = calcium-enriched mixture

MTA = mineral trioxide aggregate

Biod: Biodentine

CH = calcium hydroxide

PRF = platelet rich fibrin

TF = TotalFill
